# Supplementary material for: In situ formation of silver nanostructures produced via laser irradiation within sol–gel derived films and their interaction with a fluorescence tagged protein
Source: Royal Society of Chemistry journal article supplement (doi:10.1039/c0cp01081b), 2010-01-01
Supplement: c0cp01081b.pdf [file c0cp01081b.pdf]

## Supporting information

(a)

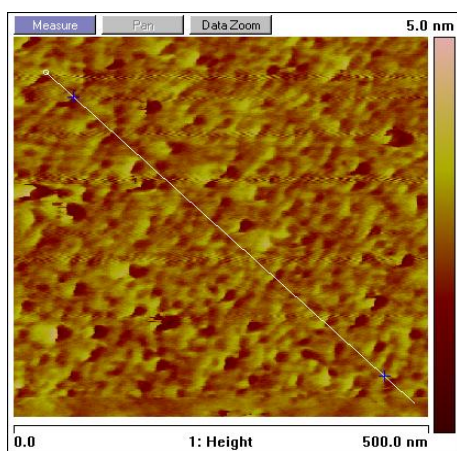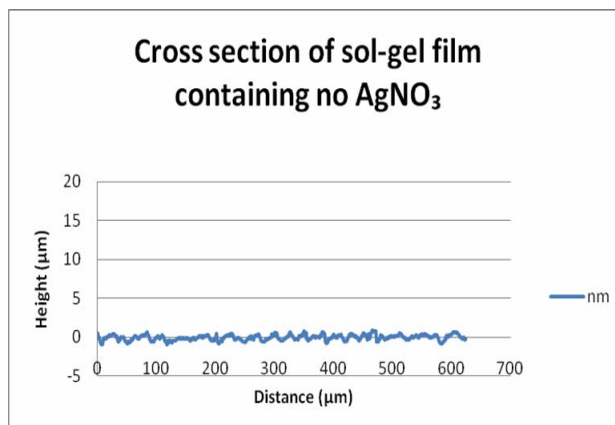

(b)

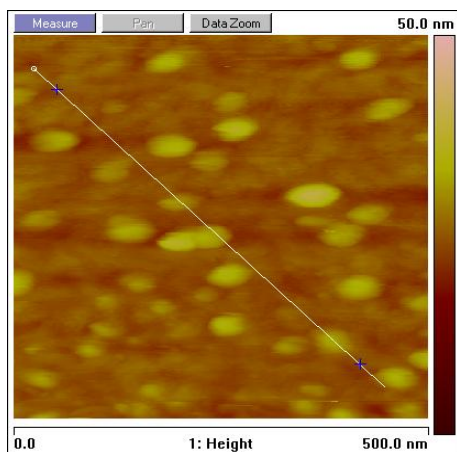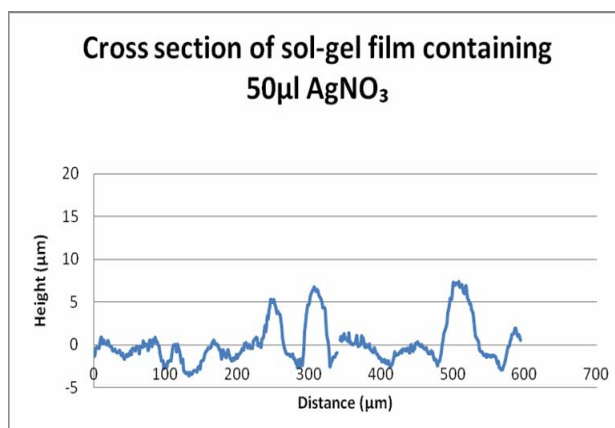

(c)

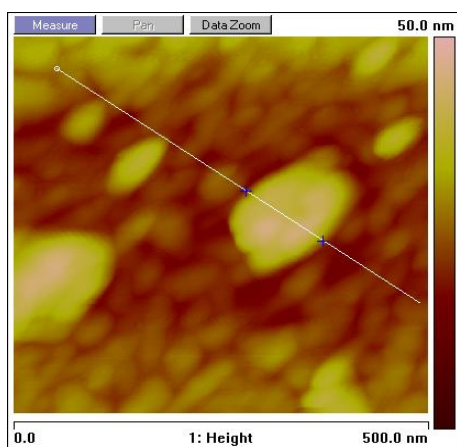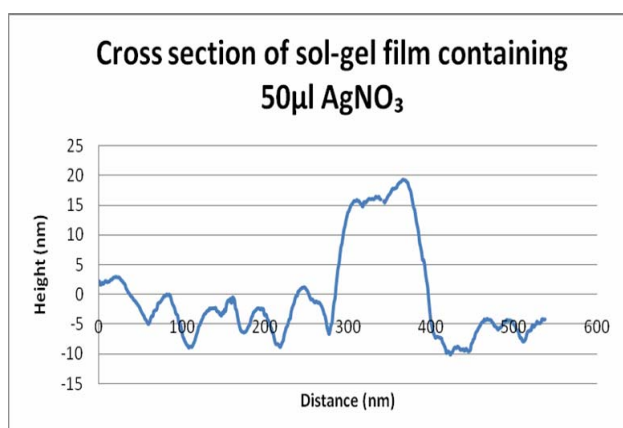

2-D AFM images and sections of sol-gel derived silica films. (a) without silver nitrate, (b) with silver nitrate no photoactivation, (c) with silver nitrate and photoactivation.
